# Supplementary material for: Primary Aldosteronism Presenting with Hypertension Five Days after Delivery: A Case Report and Literature Review
Source: PubMed Central journal article supplement — Intern Med. 2021 Aug 13;61(4):507–12. doi: 10.2169/internalmedicine.7778-21 (PMC8907769; doi:10.2169/internalmedicine.7778-21), 2021-08-13
Supplement: 1349-7235-61-0507-s001.pdf [file 1349-7235-61-0507-s001.pdf]

**Supplementary Table 1. Results of adrenal vein sampling (March 2017).**

| Vein               | Baseline            |                               |      | After tetracosactide load |                               |      |
|--------------------|---------------------|-------------------------------|------|---------------------------|-------------------------------|------|
|                    | Aldosterone (ng/dL) | Cortisol ( $\mu\text{g/dL}$ ) | ACR  | Aldosterone (ng/dL)       | Cortisol ( $\mu\text{g/dL}$ ) | ACR  |
| Right adrenal vein | 9.2                 | 17.6                          | 0.52 | 11.8                      | 23.1                          | 0.51 |
| Left adrenal vein  | 401.1               | 121.9                         | 3.29 | 485.2                     | 155.6                         | 3.12 |
| Inferior vena cava | 21.5                | 16.7                          | 1.29 | 37.2                      | 21.7                          | 1.71 |

The selective index, calculated by dividing cortisol concentration in the adrenal vein by that in the inferior vena cava, after administration of synthetic adrenocorticotrophic hormone (tetracosactide, 0.25 mg) in the elbow vein was 1.1 for the right side and 7.2 for the left side.

The lateralization index, calculated by dividing the aldosterone-to-cortisol concentration ratio (ACR) in the left adrenal vein by that in the right adrenal vein, after administration of tetracosactide was 6.1.

The contralateral suppression index, calculated by dividing the ACR in the right adrenal vein by that in the inferior vena cava, after administration of tetracosactide was 0.4.
